# Supplementary material for: Emergence of New ST301 Shiga Toxin-Producing Escherichia coli Clones Harboring Extra-Intestinal Virulence Traits in Europe
Source: MDPI journal article supplement (doi:10.3390/toxins13100686), 2021-09-26
Supplement: s1 [file s1]

## Article

# Emergence of New ST301 Shiga Toxin-Producing *Escherichia coli* Clones Harboring Extra-Intestinal Virulence Traits in Europe

Aurélie Cointe <sup>1,\*</sup>, Etienne Bizot <sup>1</sup>, Sabine Delannoy <sup>2</sup>, Patrick Fach <sup>2</sup>, Philippe Bidet <sup>1</sup>, André Birgy <sup>1</sup>, François-Xavier Weill <sup>3</sup>, Sophie Lefèvre <sup>3</sup>, Patricia Mariani-Kurkdjian <sup>1</sup> and Stéphane Bonacorsi <sup>1</sup>

<sup>1</sup> Service de Microbiologie, Centre National de Référence *Escherichia coli*, AP-HP, Hôpital Robert-Debré, Université de Paris, IAME, UMR 1137, INSERM, 75018 Paris, France; etienne.bizot@aphp.fr (E.B.); philippe.bidet@aphp.fr (P.B.); andre.birgy@aphp.fr (A.B.); patricia.mariani@aphp.fr (P.M.-K.); stephane.bonacorsi@aphp.fr (S.B.)

<sup>2</sup> Platform IdentityPath, Food Safety Laboratory, ANSES, Université Paris-Est, 94701, Maisons-Alfort, France; sabine.delannoy@anses.fr (S.D.); patrick.fach@anses.fr (P.F.)

<sup>3</sup> Centre National de Référence des *Escherichia coli*, *Shigella* et *Salmonella*, Institut Pasteur, Unités des Bactéries Pathogènes Entériques, 75015 Paris, France; francois-xavier.weill@pasteur.fr (F.-X.W.); sophie.lefevre@pasteur.fr (S.L.)

\* Correspondence: aurelie.cointe@aphp.fr

**Table S1.** Number of ST301 sequences available in EnteroBase (on August 5, 2020) and that of those included in this study.

| Main ST301 serotypes | Total no. of sequences available by serotype | Submitting country       | no. of sequences submitted per country | no. of sequences included in Fig. 1 | no. of sequences included in Fig. 2 |
|----------------------|----------------------------------------------|--------------------------|----------------------------------------|-------------------------------------|-------------------------------------|
| O80:H2               | 218                                          | France                   | 145                                    | 4                                   | NA                                  |
|                      |                                              | Belgium                  | 10                                     | 1                                   | NA                                  |
|                      |                                              | Germany                  | 10                                     | 4                                   | NA                                  |
|                      |                                              | Poland                   | 1                                      | 0                                   | NA                                  |
|                      |                                              | United Kingdom           | 36                                     | 6                                   | NA                                  |
|                      |                                              | United States of America | 12                                     | 4                                   | NA                                  |
|                      |                                              | Spain                    | 3                                      | 3                                   | NA                                  |
|                      |                                              | Switzerland              | 1                                      | 1                                   | NA                                  |
| O55:H9               | 35                                           | France                   | 29*                                    | 3                                   | 29                                  |
|                      |                                              | United Kingdom           | 5                                      | 5                                   | 5                                   |
|                      |                                              | Germany                  | 1                                      | 1                                   | 1                                   |
| Other                | 48                                           |                          | 48                                     | 48                                  | NA                                  |
| <b>Total</b>         | <b>301</b>                                   |                          | <b>301</b>                             | <b>80</b>                           | <b>35</b>                           |

\* indicates the number of strains sequenced in this study and submitted to EnteroBase. NA: not applicable

**Table S2.** Statistic of the 29 French O55:H9 EHEC genomes sequenced in this study.

| Strain name  | Strain name<br>in Enterobase | no. of<br>contigs | N50    | no. of<br>bases | Coverage<br>(X) | GenBank accession no. |
|--------------|------------------------------|-------------------|--------|-----------------|-----------------|-----------------------|
| 41957        | 41957                        | 389               | 58144  | 5412786         | 137             | JAESQ000000000        |
| 38057        | 38057                        | 377               | 93977  | 5469344         | 34              | JAESOP000000000       |
| 38107        | 38107                        | 362               | 93736  | 5471004         | 43              | JAEBI000000000        |
| 38108        | 38108                        | 383               | 71673  | 5469948         | 31              | JAESOO000000000       |
| 38110        | PMK-38110                    | 286               | 110410 | 5327280         | 71              | JAESON000000000       |
| 38109        | PMK-38109                    | 342               | 94386  | 5470482         | 84              | JAESOM000000000       |
| 38141        | PMK-38141                    | 342               | 111326 | 5472775         | 105             | JAESOL000000000       |
| 38141delpS88 | 38141delpS88                 | 250               | 112303 | 5315838         | 91              | JAHPZW000000000       |
| 37541        | 37541                        | 346               | 98965  | 5488450         | 41              | JAEBH000000000        |
| 44329        | 44329                        | 278               | 85994  | 5429188         | 158             | JAESOK000000000       |
| 46970        | 46970                        | 399               | 51534  | 5530856         | 289             | JAESJ000000000        |
| 45468        | 201901858                    | 345               | 105264 | 5608734         | 86              | JAESOI000000000       |
| 45469        | 201901859                    | 341               | 111112 | 5607449         | 75              | JAESOH000000000       |
| 38868        | 38868                        | 303               | 75277  | 5433004         | 30              | JAESOG000000000       |
| 42850        | 42850                        | 308               | 67587  | 5183109         | 120             | JAESOF000000000       |
| 39224        | 39224                        | 330               | 74961  | 5438767         | 32              | JAESOE000000000       |
| 42605        | 42605                        | 316               | 65988  | 5414837         | 141             | JAESOD000000000       |
| 45509        | 45509                        | 330               | 65601  | 5412902         | 95              | JAESOC000000000       |
| 42592        | 42592                        | 346               | 64875  | 5488453         | 139             | JAESOB000000000       |
| 43000        | 43000                        | 540               | 29463  | 5359381         | 75              | JAESOA000000000       |
| 42262        | 42262                        | 286               | 74439  | 5411100         | 159             | JAESNZ000000000       |
| 43002        | 43002                        | 463               | 31168  | 5211466         | 110             | JAESNY000000000       |
| 44501        | 201808622                    | 359               | 53002  | 5416898         | 49              | JAESNX000000000       |
| 42823        | 42823                        | 336               | 67587  | 5490236         | 305             | JAESNW000000000       |
| 42822        | 42822                        | 380               | 47442  | 5453576         | 154             | JAESNV000000000       |
| 45878        | 45878                        | 343               | 48689  | 5412531         | 107             | JAESNU000000000       |
| 46195        | 46195                        | 432               | 42167  | 5615820         | 83              | JAESNT000000000       |
| 46932        | 46932                        | 271               | 92632  | 5449847         | 231             | JAESNS000000000       |
| 47050        | 47050                        | 303               | 87113  | 5440986         | 198             | JAESNR000000000       |
